# Supplementary material for: Autonomic symptoms following Zika virus infection
Source: Springer Nature journal article supplement (doi:10.1007/s10286-018-0515-1), 2018-03-01
Supplement: MOESM1 [file 15500286]

Por favor responda y marque con una **X** según corresponda. Recuerde que no hay hay respuestas correctas ni incorrectas

1. En el último año, ¿Alguna vez se ha sentido débil, mareado, raro o ha tenido dificultad para pensar poco después de levantarse después de estar sentado o acostado?
   1. Sí.
   2. No. **(Si marcó ‘No’, pase a la pregunta # 5)**
2. Al levantarse, ¿Con qué frecuencia experimenta estas sensaciones o síntomas?
   1. Rara vez.
   2. Ocasionalmente.
   3. Frecuentemente.
   4. Casi siempre.
3. ¿Cómo calificaría la severidad de estas sensaciones o síntomas?
   1. Leve.
   2. Moderada.
   3. Severa.
4. En el último año, estas sensaciones o síntomas que usted ha experimentado, se están volviendo:
   1. Mucho peores.
   2. Algo peores.
   3. Permanecen casi igual.
   4. Algo mejores.
   5. Mucho mejores.
   6. Desaparecido completamente.
5. En el último año, ¿Ha notado alguna vez cambios de color en su piel, tales como rojo, blanco o morado?
   1. Sí.
   2. No. **(Si marcó ‘No’, pase a la pregunta # 8)**
6. ¿Cuáles partes de su cuerpo son afectadas por el cambio de color? **(Marque todas las que apliquen)**
   1. Manos.
   2. Pies.
7. Estos cambios de color de su piel se están volviendo:
   1. Mucho peores.
   2. Algo peores.
   3. Permanecen casi igual.
   4. Algo mejores.
   5. Mucho mejores.
   6. Desaparecido completamente.
8. En los últimos 5 años, ¿qué cambios, si los hubo, han ocurrido en la sudoración corporal?
   1. Sudo mucho más de lo que sudaba antes.
   2. Sudo un poco más de lo que sudaba antes.
   3. No he notado ningún cambio en mi sudoración.
   4. Sudo un poco menos de lo que sudaba antes.
   5. Sudo mucho menos de lo que sudaba antes.
9. ¿Siente sus ojos excesivamente secos?
   1. Sí.
   2. No.
10. ¿Siente su boca excesivamente seca?
    1. Sí.
    2. No.
11. Para el síntoma (es decir, ojos secos o boca seca) que haya durado el mayor periodo de tiempo, este síntoma se está volviendo:
    1. No he tenido ninguno de estos síntomas.
    2. Mucho peor.
    3. Un poco peor.
    4. Permanece casi igual.
    5. Un poco mejor.
    6. Mucho mejor.
    7. Ha desaparecido completamente.
12. En el último año, ¿Ha notado algún cambio en cuanto a la rapidez con que se llena al comer una comida?
    1. Me lleno mucho más rápido ahora de lo que lo hacía antes.
    2. Me lleno más rápido de lo que lo hacía antes.
    3. No he notado ningún cambio.
    4. Me siento lleno menos rápido ahora de lo que lo hacía antes.
    5. Me siento lleno mucho menos rápido ahora de lo que lo hacía antes.
13. En el último año, ¿Se ha sentido excesivamente lleno o persistentemente lleno (sensación de llenura) después de una comida?
    1. Nunca.
    2. A veces.
    3. Muchas veces.
14. En el último año, ¿Ha vomitado después de una comida?
    1. Nunca.
    2. A veces.
    3. Muchas veces.
15. En el último año, ¿Ha tenido retorcijones o cólicos abdominales?
    1. Nunca.
    2. A veces.
    3. Muchas veces.
16. En el último año, ¿Ha tenido algún episodio de diarrea?
    1. Sí.
    2. No. **(Si marcó ‘No’, pase a la pregunta # 20)**
17. ¿Con qué frecuencia ocurre esto?
    1. Rara vez.
    2. Ocasionalmente.
    3. Frecuentemente (_________ veces al mes).
    4. Constantemente.
18. ¿Qué tan severos son estos episodios de diarrea?
    1. Leves.
    2. Moderados.
    3. Severos.
19. Sus episodios de diarrea se están volviendo:
    1. Mucho peores.
    2. Algo peores.
    3. Permanecen casi igual.
    4. Algo mejores.
    5. Mucho mejores.
    6. Desaparecido completamente.
20. En el último año, ¿Ha estado estreñido?
    1. Sí.
    2. No. **(Si marcó ‘No’, pase a la pregunta #24)**
21. ¿Con qué frecuencia está estreñido?
    1. Rara vez.
    2. Ocasionalmente.
    3. Frecuentemente (_________ veces al mes).
    4. Constantemente.
22. ¿Qué tan severos son estos episodios de estreñimiento?
    1. Leves.
    2. Moderados.
    3. Severos.
23. Su estreñimiento se está volviendo:
    1. Mucho peor.
    2. Un poco peor.
    3. Permanece casi igual.
    4. Un poco mejor.
    5. Mucho mejor.
    6. Ha desaparecido completamente.
24. En el último año, ¿Alguna vez ha perdido control sobre la función de su vejiga?
    1. Nunca.
    2. Ocasionalmente.
    3. Frecuentemente (_________ veces al mes).
    4. Constantemente.
25. En el último año, ¿Ha tenido problemas para que fluya la orina?
    1. Nunca.
    2. Ocasionalmente.
    3. Frecuentemente (_________ veces al mes).
    4. Constantemente.
26. En el último año, ¿Ha tenido problemas para vaciar completamente su vejiga?
    1. Nunca.
    2. Ocasionalmente.
    3. Frecuentemente (_________ veces al mes).
    4. Constantemente.
27. En el último año, sin el uso de gafas de sol o gafas con lentes de color, ¿La luz brillante le ha molestado sus ojos?
    1. Nunca. **(Si marcó ‘Nunca’, pase a la pregunta # 29)**
    2. Ocasionalmente.
    3. Frecuentemente.
    4. Constantemente.
28. ¿Qué tan severa es la sensibilidad a la luz brillante?
    1. Leve.
    2. Moderada.
    3. Severa.
29. En el último año, ¿Ha tenido problemas enfocando con sus ojos?
    1. Nunca. **(Si marcó ‘Nunca’, pase a la pregunta # 31)**
    2. Ocasionalmente.
    3. Frecuentemente.
    4. Constantemente.
30. Qué tan severo es el problema para enfocar?
    1. Leve.
    2. Moderado.
    3. Severo.
31. El síntoma más molesto con sus ojos (es decir, sensibilidad a la luz brillante o problemas para enfocar) se está volviendo:
    1. No he tenido ninguno de estos síntomas.
    2. Mucho peor.
    3. Un poco peor.
    4. Permanece casi igual.
    5. Un poco mejor.
    6. Mucho mejor.
    7. Ha desaparecido completamente.
